# Supplementary material
Source: MDPI journal article supplement (https://www.mdpi.com/2311-5637/9/12/1011)
Supplement: s1 [file s1]

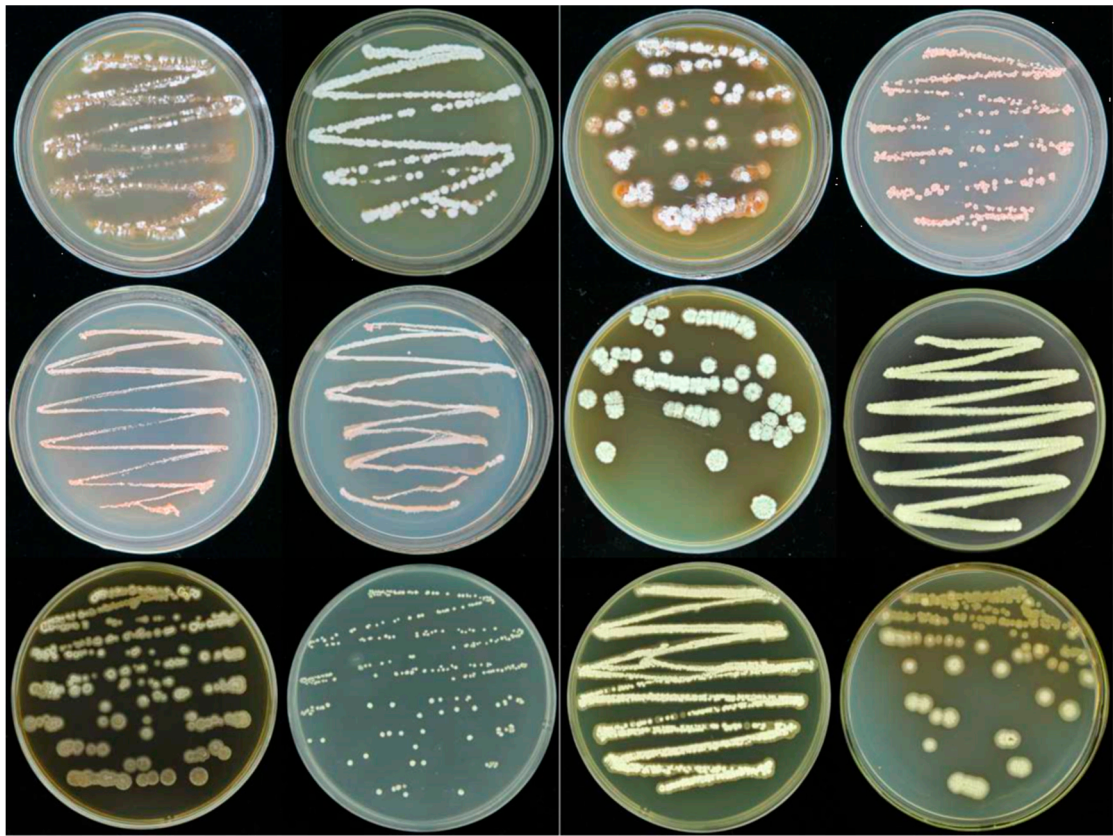

Figure S1. The colony morphology of some actinomycetes strains

**Table S1** The inhibition of actinomycetes against *P. litchii*

| Number    | Inhibitory<br>diameter(mm) | Number     | Inhibitory<br>diameter(mm) |
|-----------|----------------------------|------------|----------------------------|
| TJSCA-02  | 3.1                        | TJATCC-215 | 1.7                        |
| TJSCA-17  | 12.8                       | TJATCC-17  | 4.8                        |
| TJSCA-71  | 17.3                       | TJATCC-43  | 6.8                        |
| TJSCA-12  | 4.2                        | TJATCC-56  | 7.3                        |
| TJSCA-75  | 8.7                        | TJSIM-13   | 9.5                        |
| TJGA-82   | 9.3                        | TJSIM-26   | 5.3                        |
| TJGA-19   | 21.4                       | TJSIM-09   | 6.7                        |
| TJGA-32   | 3.6                        | TJSIM-67   | 8.1                        |
| TJGA-66   | 5.8                        | BWL-H9     | 4.5                        |
| TJGA-10   | 2.6                        | BWL-H1     | 9.2                        |
| TJGA-112  | 4.9                        | BWL-H17    | 8.6                        |
| TJHV--17  | 4.7                        | BWL-H49    | 4.8                        |
| TJHV--119 | 1.2                        | BWL-H31    | 8.7                        |
|           |                            | BWL-H52    | 1.3                        |

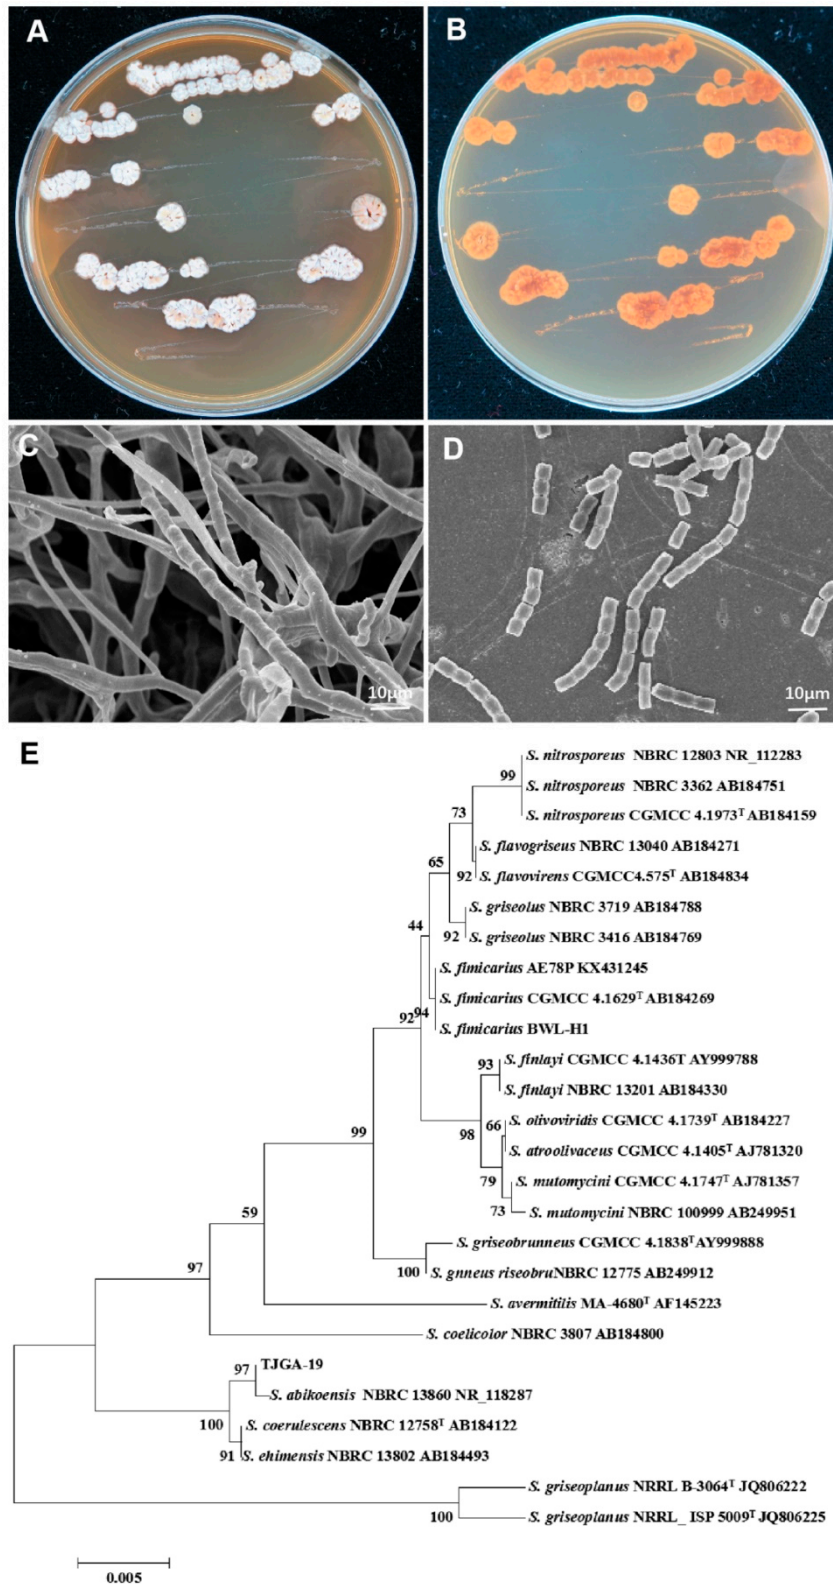

**Figure S2.** Cultural and morphological characteristics and phylogenetic tree based on 16S rDNA sequences of antagonistic actinomycete strain TJGA-19. (A, B): top and reverse of colony morphology on ISP2 medium; (C, D): aerial mycelium and spores were observed by scanning electron microscopy; (E): phylogenetic tree for strain TJGA-19 based on 16S rDNA sequences analysis and constructed using the neighbor-joining method .
